# Supplementary material
Source: PubMed Central journal article supplement (PMC5173463)
Supplement: supp_4.4.E599_2015-0124-Original_submission.pdf [file supp_4.4.E599_2015-0124-Original_submission.pdf]

1  
2  
3 Meta-analysis shows that binge drinking, but not over guideline  
4 drinking, has increased substantially from 1996 to 2013 in  
5 Canada  
6  
7

8 Running head: Binge drinking in Canada 1996-2013  
9

10 Andrew G.M. Bulloch<sup>a, b, c, \*</sup>, Jeanne V.A. Williams<sup>a</sup>, Dina H.  
11 Lavorato,<sup>a</sup> Scott B. Patten,<sup>a, b, c</sup>  
12  
13  
14  
15  
16  
17

18 <sup>a</sup> Department of Community Health Sciences, University of Calgary,  
19 Canada  
20

21 <sup>b</sup> Department of Psychiatry, University of Calgary, Canada  
22  
23

24 <sup>c</sup> Mathison Centre for Mental Health Research & Education,  
25 Hotchkiss Brain Institute, University of Calgary, Canada  
26  
27  
28  
29

30 \* Corresponding author: Department of Community Health Sciences,  
31 TRW 4D67, 3280 Hospital Drive NW, Calgary, Canada, T2N 4Z6. (v)  
32 403 220-4586 (f) 403-210-8840.  
33

34 *Email address:* [bulloch@ucalgary.ca](mailto:bulloch@ucalgary.ca)  
35  
36  
37  
38

39 Word count: abstract 246, text 2409  
40  
41  
42  
43  
44  
45  
46  
47  
48  
49  
50  
51  
52  
53  
54  
55  
56  
57  
58  
59  
60

## ABSTRACT

**Background:** Heavy drinking is a major factor in worldwide morbidity and mortality. Little information is available on trends in Canada regarding alcohol abuse and here we performed meta-analyses to estimate abstinence, binge drinking and over guideline drinking in the Canadian population during 1996-2013.

**Methods:** The data sources were a series of cross sectional national health surveys of the Canadian population carried out by Statistics Canada during 1996-2013. These were cross-sectional files from the National Population Health Surveys (NPHS) of 1996 and 1998, plus the Canadian Community Health Surveys (CCHS) from 2000 to 2013; the respondents were 18 years and older.

**Results:** The proportion of binge drinkers increased steadily from 13.7% (95% confidence interval [CI], 13.2-14.2%) in 1996 to 19.7% (CI 19.1-20.3%) in 2013. In terms of gender the corresponding proportions for males were 20.8% (CI 19.9-21.7%) in 1996, and 25.7% (CI 24.7-26.6%) in 2013; for females these proportions were 6.9% (6.4-7.5%) in 1996, and 13.8% (CI 13.1-14.5%) in 2013. No significant increases were observed in the proportion of over guideline drinkers or abstainers during the same time period.

**Interpretation:** The proportion of binge drinkers in the Canadian population has steadily increased during the period of 1996 to 2013, relatively more so in females than males. No evidence of an increase in the proportion of over guideline drinkers or abstainers was observed during the same time period. These results suggest that binge drinking is of particular concern regarding intervention strategies aimed at improvement of public health.

## Introduction

Abuse of alcohol contributes substantially to morbidity and mortality worldwide. For example, on a global basis, alcohol is estimated to cause 4.6% of disability adjusted-life years lost and 3.8% of all deaths [1]. Alcohol abuse is associated with liver cirrhosis, cardiovascular disease, diabetes, psychiatric disorders, cancer and significant social problems [2,3] as well as increased risk of suicide ideation and suicide attempts [4,5]. Intervention strategies at improving public health require sound epidemiological data on alcohol use over time, this being the goal of the current study of the Canadian general population.

Binge drinking is known to be a particularly dangerous form of alcohol abuse [6]. One of the first population estimates of binge drinking was for American college students [7], although the definition of binge drinking can be traced back at least to 1969 [8]. This measure is not without its critics, for example blood alcohol content may be a more sensitive measure of problem drinking [9], although not a practical approach in epidemiological surveys.

Previous studies have estimated the prevalence of binge drinking in a number of countries. There has been a tendency to focus on alcohol abuse in children and adolescents [10, 11] and college students [12], however binge drinking is also an adult problem and can extend into later years [13]. A study of Chinese adults living in Hong Kong reported a 9.0% prevalence of binge drinking [14], whereas a corresponding estimate for Brazilians is 11.4% [15] and for Africans it is 9.6% [16]. In the USA an older study of data from 19 states showed that the prevalence of binge drinking decreased from 16.9% in 1985 to 13.6% in 1999

1  
2  
3 [17]. However in more recent large nationally representative  
4 survey of adults in the USA binge drinking was found to have  
5 increased from 21.5% to 25.8% between 2001-2002 and 2012-2013  
6  
7 [18]. In all studies the prevalence of binge drinking is higher  
8 in men than women, and highest in young age groups. The goal of  
9 the present study was to estimate binge and over guideline  
10 drinking in the Canadian population by meta-analysis of data  
11 from multiple health surveys over the period from 1996 to 2013.  
12  
13  
14  
15  
16  
17  
18  
19  
20  
21  
22  
23  
24  
25  
26  
27  
28  
29  
30  
31  
32  
33  
34  
35  
36  
37  
38  
39  
40  
41  
42  
43  
44  
45  
46  
47  
48  
49  
50  
51  
52  
53  
54  
55  
56  
57  
58  
59  
60

## Methods

This study used the cross-sectional data files collected in two early cycles of the NPHS (1996 and 1998), the general health surveys of the CCHS (2000, 2003, 2005, 2007/2008, 2009/2010, 2011/2012 and 2013), plus the two mental health CCHS surveys of 2002 (CCHS 1.2) and 2012 (CCHS-MH) (Table 1). These surveys used a complex multistage sampling procedure to obtain a representative sample of the Canadian population. First geographical clusters were selected, then households were selected within the clusters and finally one respondent per household was selected.

Alcohol consumption was measured by estimating several variables in the Alcohol Module. Abstainers were identified based on the results of one question "During the past 12 months, have you had a drink of beer, wine, liquor or any other alcoholic beverage?" For above guideline drinking a 7-day diary of alcohol consumption was used to identify respondents who exceeded moderate guideline drinking (14 and 9 drinks per week for men and women respectively) [19]. Finally binge drinking was defined as consumption of five or more drinks at least once a

1  
2  
3 month in the past year, the usual definition of binge drinking  
4 used in Statistics Canada surveys.  
5  
6

7  
8 Variables included as potential confounders and effect  
9 modifiers included age and gender. Although data is available  
10 for 12-17 year olds, the data presented here are for 18+ years  
11 old only, i.e., those of minimum legal drinking age in most  
12 Canadian provinces.  
13  
14  
15

16  
17 We initially examined the data with forest plots of frequency  
18 estimates with 95% confidence intervals for each survey (these  
19 plots are not shown). Appropriate sampling weights and bootstrap  
20 variance estimation procedures were employed as recommended by  
21 Statistics Canada. Heterogeneity was first examined using the  $I^2$   
22 statistic that represents the residual variation due to  
23 heterogeneity. Subsequently random effects meta-regression was  
24 used to quantify changes over time (i.e., time was a variable  
25 included in the models) and to adjust for study level co-  
26 variates. These results are shown as graphs. Goodness of fit was  
27 assessed by the associated  $I^2$  value and the  $R^2$  value (proportion  
28 of between study variance explained). These analyses used the  
29 "metan" command in Stata version 13 and were conducted in the  
30 Prairie Regional Data Centre of Statistics Canada at the  
31 University of Calgary. This research was approved by the Ethics  
32 Review Board of the University of Calgary.  
33  
34  
35  
36  
37  
38  
39  
40  
41  
42  
43  
44  
45  
46  
47  
48

## 49 **Results**

50  
51 The surveys used in the current study and the total number of  
52 available observations are shown in Table 1. As is typical of  
53 Statistics Canada surveys missing data were minimal (<2%).  
54  
55  
56  
57  
58  
59  
60

1  
2  
3  
4  
5  
6  
7  
8  
9  
10  
11  
12  
13  
14  
15  
16  
17  
18  
19  
20  
21  
22  
23  
24  
25  
26  
27  
28  
29  
30  
31  
32  
33  
34  
35  
36  
37  
38  
39  
40  
41  
42  
43  
44  
45  
46  
47  
48  
49  
50  
51  
52  
53  
54  
55  
56  
57  
58  
59  
60

Inspection of the raw data for binge drinking shows an increase from 1996 to 2013 from 13.7% (95% CI 13.2-14.2) to 19.7% (95% CI 19.1-20.3) overall. As expected the proportion of male binge drinkers was higher than that for females, the increase for males being from 20.8% (95% CI 19.9-21.7) to 25.7% (24.7-26.6), whereas as for females it was from 6.9% (95% CI 6.4-7.5) to 13.8% (95% CI 13.1-14.5). A preliminary inspection of a forest plot (not shown) gave a visual impression that the proportion of male and female binge drinkers increased from 1996 to 2013 in a linear fashion, the  $I^2$  values being 95.2% and 97.8% respectively. The linear meta-regression model shown in Figure 1 shows a very good visual fit for both males and females whose fitted lines appear to be parallel, the fit being better for females than males. This visual impression is supported by a lower  $I^2$  values of 90.2% and 83.7% for males and females, the  $R^2$  values being 57.6% and 91.6% for males and females respectively. Time was significant in the models for both males (beta =0.003, t = 3.49, p = 0.007) and females (beta = 0.003, t = 8.99, p < 0.001). It is notable that the slope values (beta values) are the same for males and females which confirms the visual impression that the two fitted lines are parallel.

Inspection of the raw data and a forest plot (not shown) for above guideline drinking showed no clear trend between 1996 and 2013 (Figure 2). The overall proportion of above guideline drinkers in 1996 and 2013 was 5.3% (95% CI 4.9-5.6) and 4.9% (95% CI 4.6-5.2) respectively. Again as expected the proportion of males was greater than that of females, the proportions in 2013, for example, being 5.9% (5.5-6.3) for males and 3.9% (95% CI, 3.5-4.3) for females. Compared to the binge drinking data, the above guideline data showed surprising heterogeneity, for example note the relatively low values for males in 2007/2008

1  
2  
3 and 2013 (Figure 2). Also as expected linear meta-regression  
4 models for both males and females showed poor fits, time was not  
5 significant,  $I^2$  values were  $> 97\%$  and  $R^2$  values were negative.  
6  
7

8  
9 The raw data and forest plot (not shown) for abstainers from  
10 1996 to 2013 was dissimilar to both of the binge and above  
11 guideline data and suggestive of a curvilinear trend. The  
12 prevalence data appears to decrease from 1996 to about 2005-2006  
13 and increase thereafter (Fig 3). The overall proportion of  
14 abstainers in 1996 and 2013 was 22.4% (95% CI 21.8-23.1) and  
15 20.3% (19.7-20.9). Abstinence was higher in females, for  
16 example the proportions in 2013 were 24.6% (95% CI 23.7-25.6)  
17 for females and 15.8% (95% CI 15.0-16.7) for males. As expected  
18 linear meta-regression models showed poor fits for both genders,  
19  $I^2$  and  $R^2$  values being  $>90\%$  and  $<20\%$ . However addition of a time  
20 squared variable to the model gave a very good visual fit for  
21 both genders (Figure 3). This visual impression is supported by  
22 the statistics, the  $I^2$  values decreasing to 79.4 % and 86.4% for  
23 males and females. Also the  $R^2$  values increased to 55.4% and  
24 52.8% for males and females respectively. Time was significant  
25 in the models for both males (beta = -0.005, t = -3.08, p =  
26 0.018) and females (beta = -0.008, t = -2.81, p = 0.026). Time  
27 squared was significant for males (beta = 0.0003, t = 2.73, p =  
28 0.030), but was not significant for females (beta = 0.0003, t =  
29 2.32, p = 0.053).  
30  
31  
32  
33  
34  
35  
36  
37  
38  
39  
40  
41  
42  
43  
44  
45  
46  
47  
48

### 49 **Interpretation**

50  
51  
52 A clear linear increase in binge drinking by both males and  
53 females was observed from 1996 to 2013 (Figure 1). Visual  
54 impressions of these linear trends were confirmed by the  
55 statistics accompanying the linear meta-regression analyses in  
56  
57  
58  
59  
60

1  
2  
3 which time was highly significant. Residual heterogeneity was  
4 higher in males than females as apparent in the graphs (Figure  
5 1). Another visual impression that the fitted regression lines  
6 are parallel for males and females is confirmed by the slope  
7 coefficients (beta values) that were the same. In contrast to  
8 the binge drinking data the above guideline data was highly  
9 heterogeneous and showed no clear trend with time (Figure 2). It  
10 is unknown, for example, why the estimates for males in  
11 2007/2008 and 2013 were low and close to those for females in  
12 these surveys. Attempts to fit linear meta-regression models  
13 were unsuccessful as expected. In terms of abstainers,  
14 prevalence estimates showed an apparent curvilinear trend  
15 (Figure 3) and quadratic equations with a time squared variable  
16 gave very good visual fits and time was significant for both  
17 genders. Time squared was significant for men ( $p=0.030$ ) but not  
18 for women ( $p=0.053$ ). Based on these statistics we conclude  
19 there is suggestive, but not conclusive, evidence that favors a  
20 quadratic model, with abstinence levels dipping to a low in  
21 2005-2006 and increasing thereafter. To summarize our data, the  
22 prevalence binge drinking has increased steadily from 1996 to  
23 2013 from about 14% to 20% overall. The prevalence of above  
24 guideline drinking was about 5-8% during this period with no  
25 clear trend over time. Abstinence may have reached a low point  
26 in 2005 - 2006 and was in the range of 18-22% during 1996 to  
27 2013.

28  
29  
30  
31  
32  
33  
34  
35  
36  
37  
38  
39  
40  
41  
42  
43  
44  
45  
46  
47  
48 Our data on estimates of the prevalence of binge drinking are  
49 somewhat lower than two estimates for the USA that overlap our  
50 study period. In two large nationally representative survey of  
51 adults in the USA binge drinking was found to have increased  
52 from 21.5% to 25.8% between 2001-2002 and 2012-2013 [18]. Our  
53 estimates for 2002 and 2013 were 17.0% and 19.7%. Given the many  
54  
55  
56  
57  
58  
59  
60



1  
2  
3 similar socioeconomic factors in common between Canada and the  
4 USA it would be expected that the extent of binge drinking would  
5 be similar in the two countries, and the closeness of the  
6 estimates helps to reaffirm their probable accuracy. Also the  
7 increase of binge drinking in the USA is apparently part of a  
8 longer trend since earlier estimates for 1991 and 2001  
9 (combined) were in the 14.7-21.6% range [20]. Our data are also  
10 in line with estimates of increased binge drinking in England  
11 from 2001 to 2009 which rose from a prevalence of 21.7% to 37.9  
12 % during this period [21]. It should be noted that UK definition  
13 of binge drinking is 8/6 drinks (males/females) on the heaviest  
14 drinking day of the past week. So although direct comparison of  
15 binge drinking prevalence in Canada/USA to the UK is difficult,  
16 all 3 countries showed a steady increase in overlapping time  
17 periods. In contrast to Canada, the USA and the UK, estimates of  
18 binge drinking prevalence in Africa, Brazil, and Hong Kong are  
19 much lower in the 9-12 % range (see Introduction). Whether these  
20 lower values are underestimates for these nations is unknown. It  
21 has been observed that binge drinking is subject to age, period  
22 and cohort effects [22], factors beyond the scope of the present  
23 study.  
24  
25  
26  
27  
28  
29  
30  
31  
32  
33  
34  
35  
36  
37  
38  
39

40 In Canada alcohol abuse is monitored by the Canadian Alcohol  
41 and Drug Use Monitoring Survey (CADUMS) since 2008 [23]. This  
42 survey uses its own definitions of at risk drinking and does not  
43 report binge drinking using the 5 drink measure as such. We used  
44 the original data from the Public Use files and estimate the  
45 prevalence of binge drinking in 2008 and 2012 to be 16.7% (CI  
46 15.5-17.9%) and 14.8% (CI 13.6-16.2%) respectively, with no  
47 evidence of a trend during this period. Inspection of our data  
48 shows an apparent increase in prevalence in females, but not  
49 males, during 2008-2012 (Fig 1). Our period of data collection  
50  
51  
52  
53  
54  
55  
56  
57  
58  
59  
60

1  
2  
3 (18 years) is much longer than the CADUMS (6 years), and has the  
4 capability to reveal longer term trends. Another difference  
5 between these studies is that the CADUMS population was 15+  
6 whereas we used 18+.  
7  
8  
9

### 10 11 **Limitations**

12  
13  
14 Limitations of the study lie in its reliance of self- report  
15 with no independent measures, for example, of blood alcohol  
16 concentration. Limitations of the five drink definition of binge  
17 drinking were discussed in the Introduction.  
18  
19  
20

### 21 **Strengths**

22  
23  
24 We were able to examine drinking trends over an unusually long  
25 study period of 18 years (1996-2013). This was made possible by  
26 a meta-analysis of eleven Statistics Canada health surveys  
27 during this period. Another strength is the large sample sizes  
28 (ranging from about 14,000 to 120,000 over the 11 surveys).  
29 Further the surveys used consistent questions to determine  
30 alcohol use.  
31  
32  
33  
34  
35  
36

### 37 **Conclusion**

38  
39  
40 That one fifth of the Canadian population are currently binge  
41 drinkers is of considerable concern for public health and  
42 provides data for evidence based health regulations and  
43 policies. Binge drinking is known to be a particularly dangerous  
44 form of alcohol abuse that is strongly related to myocardial  
45 infarction, unsafe sex, violence and injuries [6]. A number of  
46 focused interventions and public health policies have been  
47 implemented [2], but the observed steady increase of binge  
48 drinking poses a major challenge for current and future public  
49 health provision.  
50  
51  
52  
53  
54  
55  
56  
57  
58  
59  
60

## References

1. Rehm J, Mathers C, Popova S, Thavorncharoensap M, Teerawattananon Y, Patra J. Global burden of disease and injury and economic cost attributable to alcohol use and alcohol-use disorders. *Lancet* 2009;373:2223-2233.
2. Giesbrecht N, Stockwell T, Kendall P, Strang R. Alcohol in Canada: reducing the toll through focused interventions and public health policies. *CMAJ* 2011;183:450-454.
3. Kraus L, Baumeister SE, Pabst A, Orth B. Association of Average Daily Alcohol Consumption, Binge Drinking and Alcohol-Related Social Problems: Results from the German Epidemiological Surveys of Substance Abuse. *Alcohol Alcoholism* 2004;44:413-320.
4. Glasheen C, Pemberto, MR, Lipari R, Copello EA, Mattson ME. Binge drinking and the risk of suicidal thoughts, plans, and attempts. *Add Behav* 2015;43:42-49
5. Shaffer M, Jegli, EL, Stanley B, 2008. Suicidal behavior, ideation, and binge drinking among college students. *Arch Suicide Res* 2008;12:124-132.
6. Flegel K, MacDonald N, Hebert PC. Binge drinking: all too prevalent and hazardous. *CMAJ* 2011;183:411.
7. Wechsler H, Davenport A, Dowdall G, Moeykens B, Sonia Castillo S. Health and Behavioral Consequences of Binge Drinking in College. A National Survey of Students at 140 Campuses. *JAMA* 1994;272:1672-1677.
8. Wechsler H, Austin SB. Binge drinking: the five/four measure. *J Stud Alcohol* 1998;59:122-124.
9. Filmore MT, Jude MJ. Defining "Binge" drinking as five drinks per occasion or drinking to a .08% BAC: which is more sensitive to risk? *Amer J Addictions* 2011;20:468-475.
10. Wellman RJ, Contreras GA, Dugas EN, O'Loughlin EK, O'Loughlin JL. Determinants of sustained binge drinking in young adults. *Alcoholism: Clin Exp Res* 2014;38:1409-1415.
11. Pederson W, von Soest T. Adolescent alcohol use and binge drinking: an 18-year trend study of prevalence and causes. *Alcohol and Alcoholism* 2015;50:219-225.
12. Beets MW, Flay BR, Vuchinich S, Li K-K, Acock, A, Snyder FJ. Longitudinal patterns of binge drinking among first year college students with a history of tobacco use. *Drug Alcohol Depend* 2009;103:1-8.
13. Blazer DG, Wu L-T. The epidemiology of at-risk and binge drinking among middle-aged and elderly community adults: national survey on drug use and health. *Am J Psychiatry* 2009;166:1162-1169.

14. Kim JH, Lee S, Chow J, Lau J, Tsang A, Choi J, Griffiths SM. Prevalence and the factors associated with binge drinking, alcohol abuse, and alcohol dependence: a population-based study of Chinese adults in Hong Kong. *Alcohol Alcoholism* 2008;43:360-370.
15. Castro DS, Sanchez ZM, Zaleski M, Alves HNP, Pinsky I, Caetano R, Laranjeira RR. Sociodemographic characteristics associated with binge drinking among Brazilians. *Drug Alcohol Depend* 2012;126:272-276.
16. Peltzer K, Davids A, Njuho P. Alcohol use and problem drinking in South Africa: findings from a national population-based study. *Afr J Psychiatry* 2011;14:30-37
17. Serdula MK, Brewer RD, Gillespie C, Denny, CH, Mokdad A. Trends in alcohol use and binge drinking, 1985-1999. Results of a multi-state study. *Am J Prev Med* 2004;26:294-298.
18. Dawson DA, Goldstein RB, Saha TD, Grant BF. Changes in alcohol consumption: United States, 2001-2002 to 2012-2013. *Drug Alcohol Depend* 2015;148:56-61.
19. Centre for Addiction and Mental Health, 2011. Low Risk Drinking Guidelines; available at [http://www.camh.net/About\\_Addiction\\_Mental\\_Health/Drug\\_and\\_Addiction\\_Information/low\\_risk\\_drinking\\_guidelines.html](http://www.camh.net/About_Addiction_Mental_Health/Drug_and_Addiction_Information/low_risk_drinking_guidelines.html).
20. Miller JW, Gfroerer JC, Brewer RD, Naimi TS, Mokdad A, Giles WH. Prevalence of adult binge drinking. A comparison of two national surveys. *Am J Prevent Med* 2004;27:197-204
21. Twigg L and Moon G. The spatial and temporal development of binge drinking in England 2001-2009: An observational study. *Soc Sci Med* 2013;91:162-167.
22. Keyes KM, Miech R. Age, period, and cohort effects in heavy episodic drinking in the US from 1985 to 2009. *Drug Alcohol Depend* 2013;132:140-148.
23. Canadian Alcohol and Drug Use Monitoring Survey 2008-2012:<http://webapps6.ucalgary.ca.ezproxy.lib.ucalgary.ca/~landru/cadum/>

**Contributors:** Ms Williams and Ms Lavorato conducted the statistical analyses. The first draft of the paper was written by Dr Bulloch. Dr Patten, Ms Williams and Ms Lavorato provided critical feedback on drafts of the paper. Dr Patten was the primary investigator, and Dr Bulloch was co-investigator, on the

1  
2  
3 grant from CIHR. All authors have read and approved the final  
4 version of the paper and have agreed to its submission and  
5 publication.  
6  
7  
8  
9

10 **Funding:** This project was supported by a grant from CIHR. This  
11 Institute had no role in study design, in the collection,  
12 analysis and interpretation of data, in the writing of the  
13 report, nor in the decision to submit the article for  
14 publication. Dr Patten was supported by a salary awards by  
15 Alberta Innovates-Health Solutions.  
16  
17  
18  
19  
20  
21  
22  
23

24 **Disclaimer:** The authors have no conflicts of interest regarding  
25 the integrity of the reported findings. This research and  
26 analysis were based on data from Statistics Canada, but the  
27 opinions expressed do not represent the views of Statistics  
28 Canada.  
29  
30  
31  
32  
33  
34  
35  
36  
37  
38  
39  
40  
41  
42  
43  
44  
45  
46  
47  
48  
49  
50  
51  
52  
53  
54  
55  
56  
57  
58  
59  
60

| Survey                  | Respondents 18+ years |
|-------------------------|-----------------------|
| NPHS 1996               | 68,282                |
| NPHS 1998               | 14,150                |
| CCHS 1.1 (2000)         | 118,336               |
| CCHS 1.2 (2002)         | 35,236                |
| CCHS 2.1 (2003)         | 121,300               |
| CCHS 3.1 (2005)         | 120,559               |
| CCHS 2007/2008          | 120,838               |
| CCHS 2009/2010          | 113,796               |
| CCHS 2011/2012          | 115,131               |
| CCHS 2012 Mental Health | 23,846                |
| CCHS 2013               | 59,224                |

Table 1. Sample size availability from NPHS and CCHS surveys

Figure 1: estimated proportion of binge drinking by gender 1996 to 2013. Men (upper), women (lower).

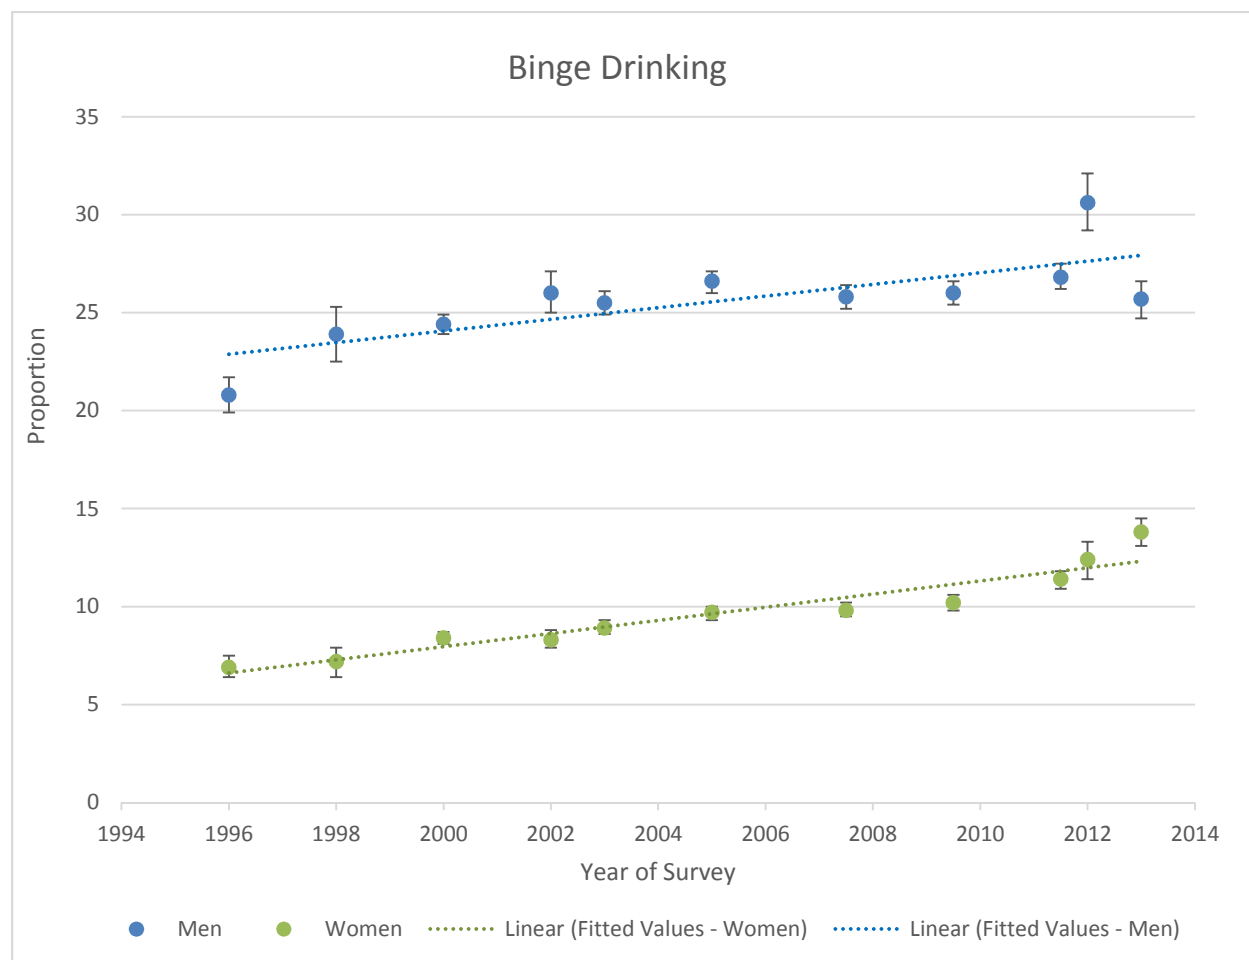

1  
2  
3  
4  
5  
6  
7  
8  
9  
10  
11  
12  
13  
14  
15  
16  
17  
18  
19  
20  
21  
22  
23  
24  
25  
26  
27  
28  
29  
30  
31  
32  
33  
34  
35  
36  
37  
38  
39  
40  
41  
42  
43  
44  
45  
46  
47  
48  
49  
50  
51  
52  
53  
54  
55  
56  
57  
58  
59  
60

Figure 2: estimated proportion of over guideline drinking by gender 1996 to 2013. Men (upper), women (lower).

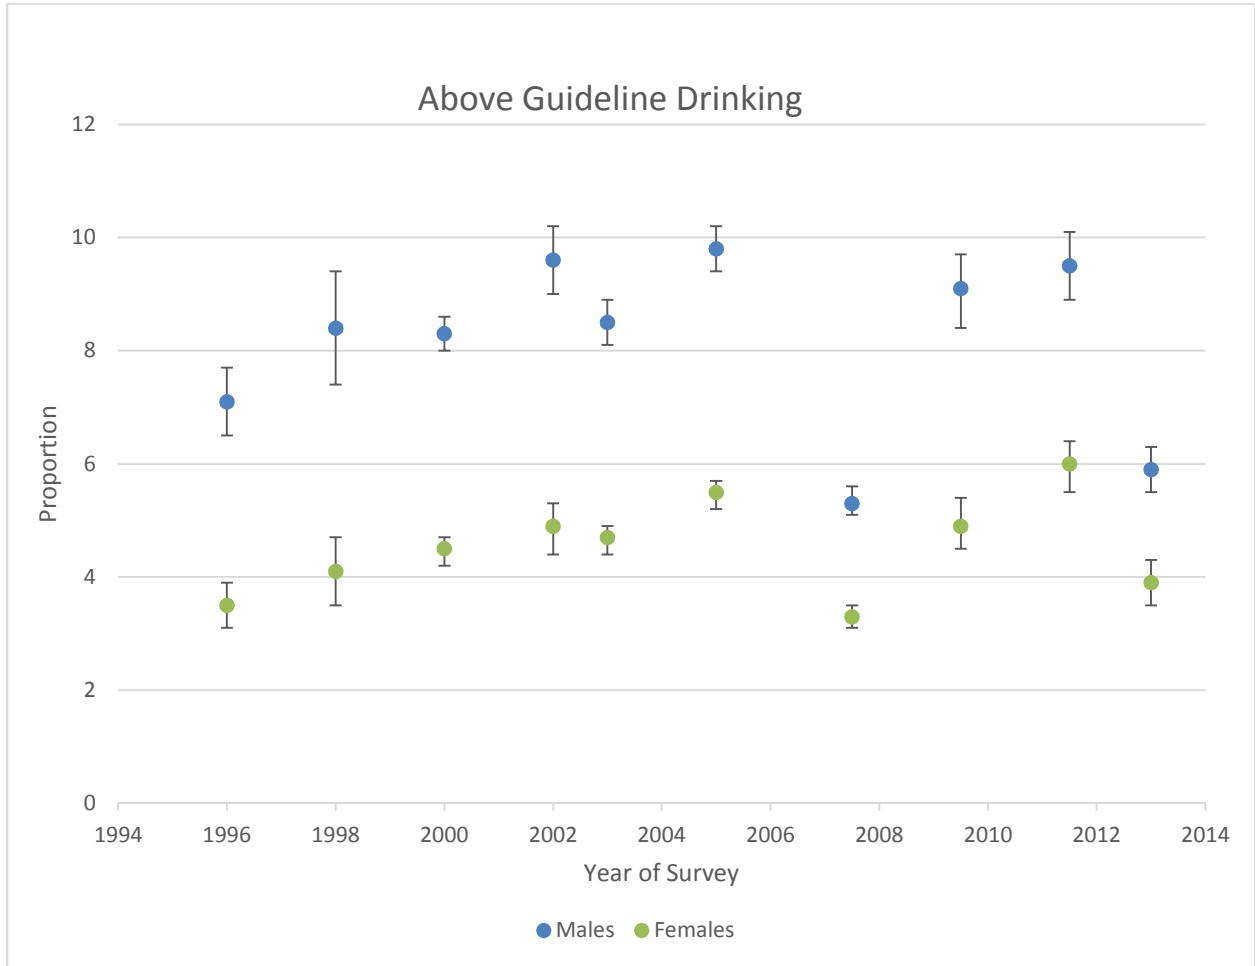



Figure 3: estimated proportion of abstaining by gender 1996 to 2013. Men (lower), women (upper).

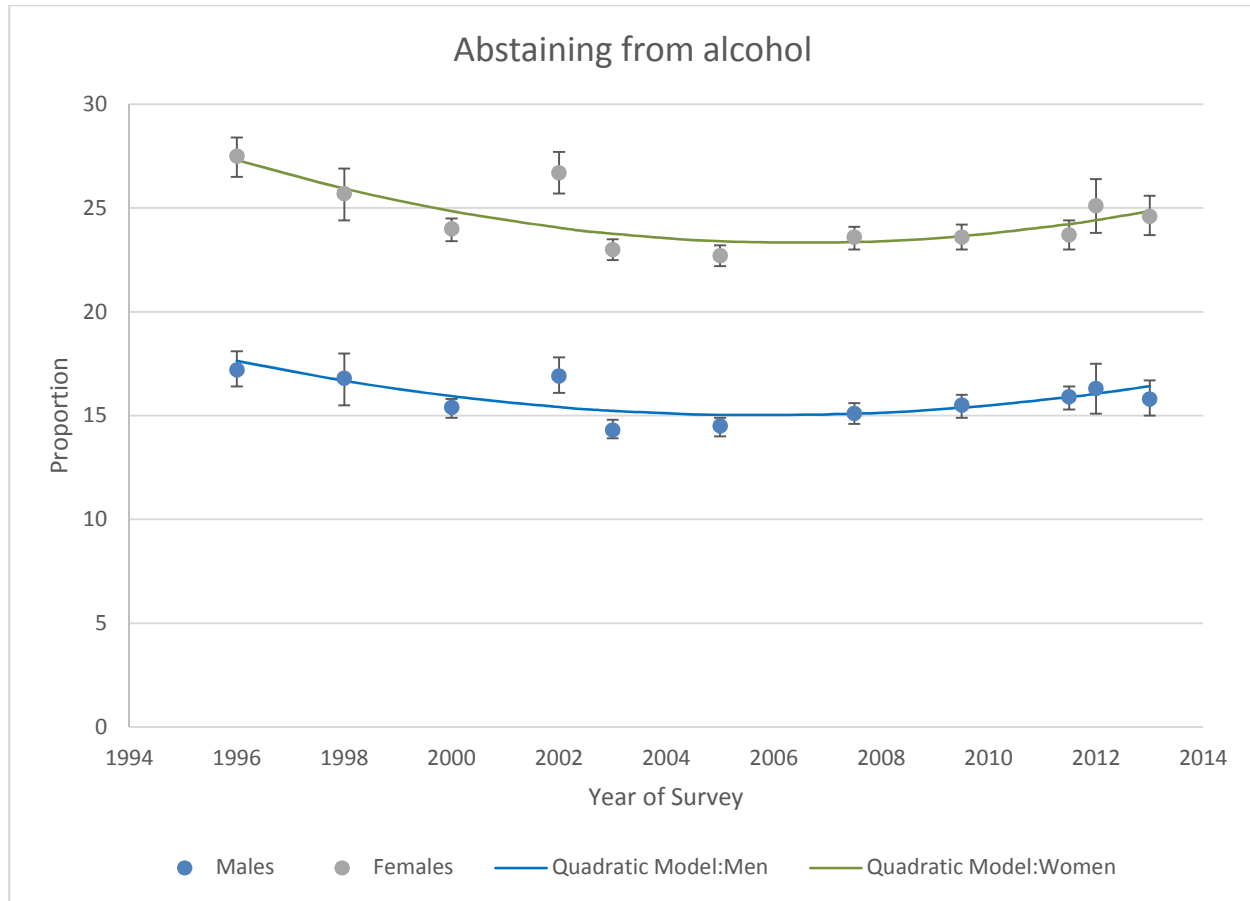

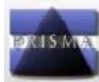

# PRISMA 2009 Checklist

| Section/topic                      | #  | Checklist item                                                                                                                                                                                                                                                                                              | Reported on page # |
|------------------------------------|----|-------------------------------------------------------------------------------------------------------------------------------------------------------------------------------------------------------------------------------------------------------------------------------------------------------------|--------------------|
| <b>TITLE</b>                       |    |                                                                                                                                                                                                                                                                                                             |                    |
| Title                              | 1  | Identify the report as a systematic review, meta-analysis, or both.                                                                                                                                                                                                                                         | 1                  |
| <b>ABSTRACT</b>                    |    |                                                                                                                                                                                                                                                                                                             |                    |
| Structured summary                 | 2  | Provide a structured summary including, as applicable: background; objectives; data sources; study eligibility criteria, participants, and interventions; study appraisal and synthesis methods; results; limitations; conclusions and implications of key findings; systematic review registration number. | 2                  |
| <b>INTRODUCTION</b>                |    |                                                                                                                                                                                                                                                                                                             |                    |
| Rationale                          | 3  | Describe the rationale for the review in the context of what is already known.                                                                                                                                                                                                                              | 3-4                |
| Objectives                         | 4  | Provide an explicit statement of questions being addressed with reference to participants, interventions, comparisons, outcomes, and study design (PICOS).                                                                                                                                                  | Methods            |
| <b>METHODS</b>                     |    |                                                                                                                                                                                                                                                                                                             |                    |
| Protocol and registration          | 5  | Indicate if a review protocol exists, if and where it can be accessed (e.g., Web address), and, if available, provide registration information including registration number.                                                                                                                               | N/a                |
| Eligibility criteria               | 6  | Specify study characteristics (e.g., PICOS, length of follow-up) and report characteristics (e.g., years considered, language, publication status) used as criteria for eligibility, giving rationale.                                                                                                      | 4                  |
| Information sources                | 7  | Describe all information sources (e.g., databases with dates of coverage, contact with study authors to identify additional studies) in the search and date last searched.                                                                                                                                  | 4                  |
| Search                             | 8  | Present full electronic search strategy for at least one database, including any limits used, such that it could be repeated.                                                                                                                                                                               | N/a                |
| Study selection                    | 9  | State the process for selecting studies (i.e., screening, eligibility, included in systematic review, and, if applicable, included in the meta-analysis).                                                                                                                                                   | 4                  |
| Data collection process            | 10 | Describe method of data extraction from reports (e.g., piloted forms, independently, in duplicate) and any processes for obtaining and confirming data from investigators.                                                                                                                                  | N/a                |
| Data items                         | 11 | List and define all variables for which data were sought (e.g., PICOS, funding sources) and any assumptions and simplifications made.                                                                                                                                                                       | 4-5                |
| Risk of bias in individual studies | 12 | Describe methods used for assessing risk of bias of individual studies (including specification of whether this was done at the study or outcome level), and how this information is to be used in any data synthesis.                                                                                      | N/a                |
| Summary measures                   | 13 | State the principal summary measures (e.g., risk ratio, difference in means).                                                                                                                                                                                                                               | 5                  |
| Synthesis of results               | 14 | Describe the methods of handling data and combining results of studies, if done, including measures of consistency (e.g., $I^2$ ) for each meta-analysis.                                                                                                                                                   | 5                  |

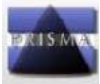

# PRISMA 2009 Checklist

| Section/topic                 | #  | Checklist item                                                                                                                                                                                           | Reported on page # |
|-------------------------------|----|----------------------------------------------------------------------------------------------------------------------------------------------------------------------------------------------------------|--------------------|
| Risk of bias across studies   | 15 | Specify any assessment of risk of bias that may affect the cumulative evidence (e.g., publication bias, selective reporting within studies).                                                             | N/a                |
| Additional analyses           | 16 | Describe methods of additional analyses (e.g., sensitivity or subgroup analyses, meta-regression), if done, indicating which were pre-specified.                                                         | 5                  |
| <b>RESULTS</b>                |    |                                                                                                                                                                                                          |                    |
| Study selection               | 17 | Give numbers of studies screened, assessed for eligibility, and included in the review, with reasons for exclusions at each stage, ideally with a flow diagram. (Table 1)                                | 5                  |
| Study characteristics         | 18 | For each study, present characteristics for which data were extracted (e.g., study size, PICOS, follow-up period) and provide the citations. (Table 1)                                                   | 5                  |
| Risk of bias within studies   | 19 | Present data on risk of bias of each study and, if available, any outcome level assessment (see item 12).                                                                                                |                    |
| Results of individual studies | 20 | For all outcomes considered (benefits or harms), present, for each study: (a) simple summary data for each intervention group (b) effect estimates and confidence intervals, ideally with a forest plot. | 5-7                |
| Synthesis of results          | 21 | Present results of each meta-analysis done, including confidence intervals and measures of consistency.                                                                                                  | 5-7                |
| Risk of bias across studies   | 22 | Present results of any assessment of risk of bias across studies (see Item 15).                                                                                                                          | N/a                |
| Additional analysis           | 23 | Give results of additional analyses, if done (e.g., sensitivity or subgroup analyses, meta-regression [see Item 16]).                                                                                    |                    |
| <b>DISCUSSION</b>             |    |                                                                                                                                                                                                          |                    |
| Summary of evidence           | 24 | Summarize the main findings including the strength of evidence for each main outcome; consider their relevance to key groups (e.g., healthcare providers, users, and policy makers).                     | 5-7                |
| Limitations                   | 25 | Discuss limitations at study and outcome level (e.g., risk of bias), and at review-level (e.g., incomplete retrieval of identified research, reporting bias).                                            | 10                 |
| Conclusions                   | 26 | Provide a general interpretation of the results in the context of other evidence, and implications for future research.                                                                                  | 10                 |
| <b>FUNDING</b>                |    |                                                                                                                                                                                                          |                    |
| Funding                       | 27 | Describe sources of funding for the systematic review and other support (e.g., supply of data); role of funders for the systematic review.                                                               | 13                 |

From: Moher D, Liberati A, Tetzlaff J, Altman DG, The PRISMA Group (2009). Preferred Reporting Items for Systematic Reviews and Meta-Analyses: The PRISMA Statement. PLoS Med 6(6): e1000097. doi:10.1371/journal.pmed1000097

For more information, visit: [www.prisma-statement.org](http://www.prisma-statement.org).
